# Supplementary material
Source: Springer Nature journal article supplement (https://www.springermedizin.de/resource/supplementary/12913_2014_3495_MOESM5_ESM.pdf/9532878)

Permutation plot (all studies)

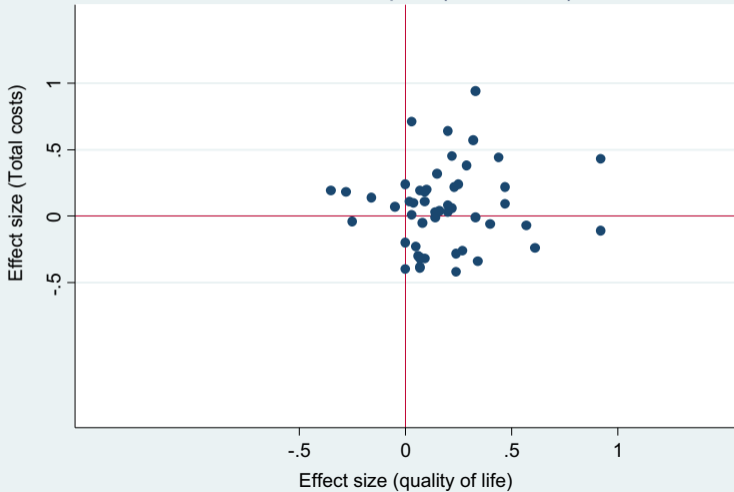

Supplement: MOESM5 [file 9532878]
